# Supplementary material
Source: publisher figshare collection journal article supplement (https://sage.figshare.com/ndownloader/files/16413803)
Supplement: Supplementary file 1 [file 16413803]

Character and conditions of housing, feeding and toilet management of cats with feline idiopathic cystitis, urolithiasis and urinary tract infection

| Parameter                                            | Total<br>(n=86)                                                  | FIC<br>(n=52)                                     | Urolithiasis<br>(n=21)                            | UTI<br>(n=13)                         | <i>P</i> value |
|------------------------------------------------------|------------------------------------------------------------------|---------------------------------------------------|---------------------------------------------------|---------------------------------------|----------------|
| <b>Character</b>                                     |                                                                  |                                                   |                                                   |                                       |                |
| <b><i>Character trait, n (%)</i></b>                 |                                                                  |                                                   |                                                   |                                       |                |
| Very shy-shy                                         | 24 (27.9%)                                                       | 12 (23.1%)                                        | 9 (42.9%)                                         | 3 (23.1%)                             | 0.564          |
| Calm                                                 | 27 (31.4%)                                                       | 18 (34.6%)                                        | 5 (23.8%)                                         | 4 (30.8%)                             |                |
| Lively-curious                                       | 35 (40.7%)                                                       | 22 (42.3%)                                        | 7 (33.3%)                                         | 6 (46.1%)                             |                |
| <b>Housing</b>                                       |                                                                  |                                                   |                                                   |                                       |                |
| <b><i>Type of housing, n (%)</i></b>                 |                                                                  |                                                   |                                                   |                                       |                |
| Indoors                                              | 18 (20.9%)                                                       | 10 (19.2%)                                        | 5 (23.8%)                                         | 3 (23.1%)                             | 0.940          |
| Indoors with restricted access outside               | 53 (61.6%): balcony (45), garden (3), terrace (4), courtyard (1) | 33 (63.5%): balcony (29), garden (2), terrace (2) | 13 (61.9%): balcony (10), terrace (2), garden (1) | 7 (53.8%): balcony (6), courtyard (1) |                |
| Outdoors                                             | 15 (17.4%)                                                       | 9 (17.3%)                                         | 3 (14.3%)                                         | 3 (23.1%)                             |                |
| <b>Space</b>                                         |                                                                  |                                                   |                                                   |                                       |                |
| Size of unit, median in m <sup>2</sup> (range)       | 76.5 (40–400)                                                    | 76.5 (40–400)                                     | 78 (40–180)                                       | 70 (40–100)                           | 0.472          |
| Number of rooms, median (range)                      | 3.5 (1–7)                                                        | 4 (2–7)                                           | 3 (1–7)                                           | 3 (2–6)                               | 0.455          |
| Cats with accessibility to all rooms, n (%)          | 77 (89.5%)                                                       | 50 (96.2%)                                        | 16 (76.2%)                                        | 11 (84.6%)                            | <b>0.022*</b>  |
| <b><i>Other pets, n (%)</i></b>                      |                                                                  |                                                   |                                                   |                                       |                |
| Cats                                                 | 61 (70.9%)                                                       | 37 (71.2%)                                        | 17 (81.0%)                                        | 7 (53.8%)                             | 0.272          |
| Dogs                                                 | 13 (15.1%)                                                       | 9 (17.3%)                                         | 3 (14.3%)                                         | 1 (7.8%)                              | 0.910          |
| No other pets                                        | 22 (25.6%)                                                       | 12 (23.1%)                                        | 4 (19.0%)                                         | 6 (46.2%)                             | 0.189          |
| <b><i>Living together with other pets, n (%)</i></b> |                                                                  |                                                   |                                                   |                                       |                |

| Parameter                                    | Total<br>(n=86)                                                                                                                                                                                                         | FIC<br>(n=52)                                                                                                                                                           | Urolithiasis<br>(n=21)                                                                                                                                       | UTI<br>(n=13)                                                                     | P value                                                                                                                                                                                                 |
|----------------------------------------------|-------------------------------------------------------------------------------------------------------------------------------------------------------------------------------------------------------------------------|-------------------------------------------------------------------------------------------------------------------------------------------------------------------------|--------------------------------------------------------------------------------------------------------------------------------------------------------------|-----------------------------------------------------------------------------------|---------------------------------------------------------------------------------------------------------------------------------------------------------------------------------------------------------|
| No quarrelling                               | 32 (50.0%)                                                                                                                                                                                                              | 20 (50.0%)                                                                                                                                                              | 9 (52.9%)                                                                                                                                                    | 3 (42.8%)                                                                         | 0.366                                                                                                                                                                                                   |
| Quarrelling                                  | 24 (37.5%):<br>once a day<br>(4), once a<br>week (10),<br>once a<br>month (10)                                                                                                                                          | 13 (32.5%):<br>once a day<br>(3), once a<br>week (3),<br>once a<br>month (7)                                                                                            | 8 (47.1%):<br>once a week<br>(6), once a<br>month (2)                                                                                                        | 3 (42.8%):<br>once a day<br>(1), once a<br>week (1),<br>once a<br>month (1)       |                                                                                                                                                                                                         |
| Avoiding each<br>other                       | 8 (12.5%)                                                                                                                                                                                                               | 7 (17.5%)                                                                                                                                                               | 0 (0%)                                                                                                                                                       | 1 (14.3%)                                                                         |                                                                                                                                                                                                         |
| Feeding                                      |                                                                                                                                                                                                                         |                                                                                                                                                                         |                                                                                                                                                              |                                                                                   |                                                                                                                                                                                                         |
| <b>Percentage of<br/>dry food,<br/>n (%)</b> |                                                                                                                                                                                                                         |                                                                                                                                                                         |                                                                                                                                                              |                                                                                   |                                                                                                                                                                                                         |
| 0-33%                                        | 21 (24.4%)                                                                                                                                                                                                              | 14 (26.9%)                                                                                                                                                              | 1 (4.8%)                                                                                                                                                     | 6 (46.1%)                                                                         | 0.061                                                                                                                                                                                                   |
| 34-66%                                       | 35 (40.7%)                                                                                                                                                                                                              | 23 (44.2%)                                                                                                                                                              | 9 (42.8%)                                                                                                                                                    | 3 (23.1%)                                                                         |                                                                                                                                                                                                         |
| 67-100%                                      | 30 (34.9%)                                                                                                                                                                                                              | 15 (28.8%)                                                                                                                                                              | 11 (52.4%)                                                                                                                                                   | 4 (30.8%)                                                                         |                                                                                                                                                                                                         |
| <b>Drinking<br/>facilities,<br/>n (%)</b>    |                                                                                                                                                                                                                         |                                                                                                                                                                         |                                                                                                                                                              |                                                                                   |                                                                                                                                                                                                         |
| Water bowl                                   | 85 (98.8%)                                                                                                                                                                                                              | 52 (100%)                                                                                                                                                               | 20 (95.2%)                                                                                                                                                   | 13 (100%)                                                                         | 0.395                                                                                                                                                                                                   |
| Other drinking<br>facilities                 | 29 (33.7%):<br>running<br>water out of<br>the tap (11),<br>drinking<br>fountain (5),<br>watering can<br>(4), flower<br>pots (3),<br>watering of<br>food (3),<br>aquarium (1),<br>bowl with cat<br>milk (1), pool<br>(1) | 18 (34.6%):<br>running<br>water out of<br>the tap (7),<br>watering can<br>(4), flower<br>pots (3),<br>watering of<br>food (2),<br>drinking<br>fountain (1),<br>pool (1) | 6 (28.6%):<br>running<br>water out of<br>the tap (2),<br>aquarium (1),<br>bowl with cat<br>milk (1),<br>drinking<br>fountain (1),<br>watering of<br>food (1) | 5 (38.5%):<br>drinking<br>fountain (3),<br>running<br>water out of<br>the tap (2) | 0.905<br>(running<br>water out of<br>the tap)<br><b>0.040*</b><br>(drinking<br>fountain)<br>0.345<br>(watering<br>can)<br>0.728 (flower<br>pots)<br>1.000<br>(watering of<br>food)<br>0.205<br>(others) |
| <b>Number of<br/>water bowls,<br/>n (%)</b>  |                                                                                                                                                                                                                         |                                                                                                                                                                         |                                                                                                                                                              |                                                                                   |                                                                                                                                                                                                         |
| 1 bowl                                       | 50 (58.8%)                                                                                                                                                                                                              | 31 (59.6%)                                                                                                                                                              | 12 (60.0%)                                                                                                                                                   | 7 (53.8%)                                                                         | 0.587                                                                                                                                                                                                   |

| Parameter                                              | Total<br>(n=86)                                                                                               | FIC<br>(n=52)                                                                                              | Urolithiasis<br>(n=21)                                                                          | UTI<br>(n=13)                                                                                   | <i>P</i> value                                                                                                            |
|--------------------------------------------------------|---------------------------------------------------------------------------------------------------------------|------------------------------------------------------------------------------------------------------------|-------------------------------------------------------------------------------------------------|-------------------------------------------------------------------------------------------------|---------------------------------------------------------------------------------------------------------------------------|
| ≥2 bowls                                               | 35 (41.2%)                                                                                                    | 21 (40.4%)                                                                                                 | 8 (40.0%)                                                                                       | 6 (46.2%)                                                                                       |                                                                                                                           |
| <b>Toilet management</b>                               |                                                                                                               |                                                                                                            |                                                                                                 |                                                                                                 |                                                                                                                           |
| <b>Type of litter box, n (%)</b>                       |                                                                                                               |                                                                                                            |                                                                                                 |                                                                                                 |                                                                                                                           |
| With hood                                              | 45 (52.3%)                                                                                                    | 28 (53.8%)                                                                                                 | 9 (42.9%)                                                                                       | 8 (61.5%)                                                                                       | 0.537                                                                                                                     |
| Without hood                                           | 47 (54.7%)                                                                                                    | 30 (57.7%)                                                                                                 | 12 (57.1%)                                                                                      | 5 (38.5%)                                                                                       | 0.445                                                                                                                     |
| <b>Number of litter boxes, n (%)</b>                   |                                                                                                               |                                                                                                            |                                                                                                 |                                                                                                 |                                                                                                                           |
| 1 litter box                                           | 54 (62.8%)                                                                                                    | 34 (65.4%)                                                                                                 | 12 (57.1%)                                                                                      | 8 (61.5%)                                                                                       | 0.799                                                                                                                     |
| ≥2 litter boxes                                        | 32 (37.2%)                                                                                                    | 18 (34.6%)                                                                                                 | 9 (42.9%)                                                                                       | 5 (38.5%)                                                                                       |                                                                                                                           |
| <b>Type of cat litter, n (%)</b>                       |                                                                                                               |                                                                                                            |                                                                                                 |                                                                                                 |                                                                                                                           |
| Clumping litter                                        | 62 (72.1%)                                                                                                    | 40 (76.9%)                                                                                                 | 17 (81.0%)                                                                                      | 5 (38.5%)                                                                                       | <b>0.019*</b>                                                                                                             |
| Other cat litter                                       | 26 (30.2%):<br>silica gel<br>litter (8),<br>wooden litter<br>(8), non-<br>clumping<br>litter (7),<br>sand (3) | 14 (26.9%):<br>silica gel litter<br>(5), non-<br>clumping<br>litter (4),<br>wooden litter<br>(2), sand (3) | 4 (19.0%):<br>silica gel litter<br>(2), non-<br>clumping<br>litter (1),<br>wooden litter<br>(1) | 8 (61.5%):<br>wooden litter<br>(5), non-<br>clumping<br>litter (2),<br>silica gel litter<br>(1) | 0.629 (non-<br>clumping<br>litter)<br><b>0.002†</b><br>(wooden<br>litter)<br>1.000 (silica<br>gel litter)<br>0.728 (sand) |
| <b>Frequency of removal of urine and faeces, n (%)</b> |                                                                                                               |                                                                                                            |                                                                                                 |                                                                                                 |                                                                                                                           |
| ≤1x daily                                              | 34 (39.5%)                                                                                                    | 18 (34.6%)                                                                                                 | 9 (42.8%)                                                                                       | 7 (53.8%)                                                                                       | 0.518                                                                                                                     |
| 2x daily                                               | 37 (43.0%)                                                                                                    | 22 (42.3%)                                                                                                 | 9 (42.8%)                                                                                       | 6 (46.2%)                                                                                       |                                                                                                                           |
| ≥3x daily                                              | 15 (17.4%)                                                                                                    | 12 (23.1%)                                                                                                 | 3 (14.3%)                                                                                       | 0 (0%)                                                                                          |                                                                                                                           |
| <b>Frequency of complete cleaning, n (%)</b>           |                                                                                                               |                                                                                                            |                                                                                                 |                                                                                                 |                                                                                                                           |
| ≤1x monthly                                            | 38 (44.2%)                                                                                                    | 22 (42.3%)                                                                                                 | 11 (52.4%)                                                                                      | 5 (38.5%)                                                                                       | 0.884                                                                                                                     |
| 1x weekly                                              | 40 (46.5%)                                                                                                    | 26 (50.0%)                                                                                                 | 8 (38.1%)                                                                                       | 6 (46.1%)                                                                                       |                                                                                                                           |
| >1x weekly                                             | 8 (9.3%)                                                                                                      | 4 (7.7%)                                                                                                   | 2 (9.5%)                                                                                        | 2 (15.4%)                                                                                       |                                                                                                                           |

| Parameter                                                                          | Total<br>(n=86)                                                                                                                                                                            | FIC<br>(n=52)                                                                                                                                                       | Urolithiasis<br>(n=21)                                                             | UTI<br>(n=13)                                                    | <i>P</i> value                                                                            |
|------------------------------------------------------------------------------------|--------------------------------------------------------------------------------------------------------------------------------------------------------------------------------------------|---------------------------------------------------------------------------------------------------------------------------------------------------------------------|------------------------------------------------------------------------------------|------------------------------------------------------------------|-------------------------------------------------------------------------------------------|
| <b>Location of litter boxes,<br/><i>n</i> (%)</b>                                  |                                                                                                                                                                                            |                                                                                                                                                                     |                                                                                    |                                                                  |                                                                                           |
| Bathroom                                                                           | 32 (37.2%)                                                                                                                                                                                 | 19 (36.5%)                                                                                                                                                          | 6 (28.6%)                                                                          | 7 (53.8%)                                                        | 0.329                                                                                     |
| Toilet                                                                             | 18 (20.9%)                                                                                                                                                                                 | 12 (23.1%)                                                                                                                                                          | 5 (23.8%)                                                                          | 1 (7.7%)                                                         | 0.488                                                                                     |
| Corridor                                                                           | 29 (33.7%)                                                                                                                                                                                 | 21 (40.4%)                                                                                                                                                          | 5 (23.8%)                                                                          | 3 (23.1%)                                                        | 0.322                                                                                     |
| Other location                                                                     | 27 (31.4%):<br>balcony (10),<br>living room<br>(5),<br>storeroom<br>(3), guest<br>bathroom<br>(2), hobby<br>room (2),<br>kitchen (2),<br>study (1),<br>bedroom (1),<br>conservatory<br>(1) | 15 (28.8%):<br>storeroom<br>(2), balcony<br>(4), guest<br>bathroom (2),<br>hobby room<br>(2), living<br>room (2),<br>conservatory<br>(1), kitchen<br>(1), study (1) | 5 (23.8%):<br>storeroom<br>(1), balcony<br>(2), kitchen<br>(1), living<br>room (1) | 7 (53.8%):<br>balcony (4),<br>living room<br>(2), bedroom<br>(1) | 0.090<br>(balcony)<br>0.251 (living<br>room)<br>1.000<br>(storeroom)<br>0.839<br>(others) |
| <b>Position of litter boxes,<br/><i>n</i> (%)</b>                                  |                                                                                                                                                                                            |                                                                                                                                                                     |                                                                                    |                                                                  |                                                                                           |
| ≤2 sides<br>accessible                                                             | 52 (60.5%)                                                                                                                                                                                 | 29 (55.8%)                                                                                                                                                          | 15 (71.4%)                                                                         | 8 (61.5%)                                                        | 1.000<br>(1 side)                                                                         |
| ≥3 sides<br>accessible                                                             | 40 (46.5%)                                                                                                                                                                                 | 26 (50.0%)                                                                                                                                                          | 6 (28.6%)                                                                          | 8 (61.5%)                                                        | 0.354<br>(2 sides)<br>0.236<br>(3 sides)<br>0.338<br>(4 sides)                            |
| <b>Presence of<br/>two litter<br/>boxes in the<br/>same room,<br/><i>n</i> (%)</b> | 15 (46.9%)                                                                                                                                                                                 | 7 (36.8%)                                                                                                                                                           | 6 (66.7%)                                                                          | 2 (40.0%)                                                        | 0.381                                                                                     |

\* No significant difference between groups in consideration of the Bonferroni correction with  $P \leq 0.017$

† Owners of cats with UTI used significantly more often wooden litter than those of cats with FIC ( $P = 0.003$ )

Questions and response options of the questionnaire

| Question                                                                                                             | Response options                                                                                                                                                        |
|----------------------------------------------------------------------------------------------------------------------|-------------------------------------------------------------------------------------------------------------------------------------------------------------------------|
| <b>1. General information</b>                                                                                        |                                                                                                                                                                         |
| 1.1. Breed                                                                                                           | 1.1. DSH; Persian; Maine Coon; etc                                                                                                                                      |
| 1.2. Age                                                                                                             | 1.2. 1 year; 2 years; 3 years; etc                                                                                                                                      |
| 1.3. Sex                                                                                                             | 1.3. Male; female                                                                                                                                                       |
| 1.4. Castration status                                                                                               | 1.4. Neutered; intact                                                                                                                                                   |
| <b>2. Character</b>                                                                                                  |                                                                                                                                                                         |
| Which character trait applies best to your cat?                                                                      | Very shy; shy; calm; lively; curious                                                                                                                                    |
| <b>3. Housing</b>                                                                                                    |                                                                                                                                                                         |
| 3.1. Which type of housing is your cat kept in?                                                                      | 3.1. Indoors; indoors with access to the balcony; indoors with restricted access outside (eg, garden, terrace); outdoors                                                |
| 3.2. How much space does your home offer to your cat?                                                                | 3.2. Please specify number of rooms, number of rooms being accessible for the cat, number of m <sup>2</sup>                                                             |
| 3.3. Are there other pets living in your home?<br>How does the living together of your cat with the other pets work? | 3.3. No; yes; if yes, please specify which other pets<br>No quarrelling; once a day quarrelling; once a week quarrelling; once a month quarrelling; avoiding each other |
| 3.4. Has a modification of housing been performed because of urination problems?                                     | 3.4. No; yes; if yes, please specify which modification                                                                                                                 |
| <b>4. Feeding</b>                                                                                                    |                                                                                                                                                                         |
| 4.1. Which type of food does your cat get?                                                                           | 4.1. Canned food; dry food; both; if both, please specify which percentages                                                                                             |
| 4.2. How many drinking facilities are available for your cat?                                                        | 4.2. Please specify number of water bowls, number of drinking fountains, other drinking facilities; if other drinking facilities, please specify which ones             |
| 4.3. Has a modification of feeding been performed because of urination problems?                                     | 4.3. No; yes; if yes, please specify modification of feeding, feeding of a diet, modification of drinking facilities                                                    |
| <b>5. Toilet management</b>                                                                                          |                                                                                                                                                                         |
| 5.1. How many litter boxes are available for your cat?                                                               | 5.1. Please specify number of litter boxes with hood, number of litter boxes without hood                                                                               |
| 5.2. Which cat litter do you use?                                                                                    | 5.2. Clumping litter; wooden litter; silica gel litter; sand; other litter; if other litter, please specify which one                                                   |
| 5.3. How often do you clean the litter box/es?                                                                       | 5.3. Please specify frequency of daily removal of faeces and urine, frequency                                                                                           |

| Question                                                                                         | Response options                                                                                                                                                                                                                                                                                   |
|--------------------------------------------------------------------------------------------------|----------------------------------------------------------------------------------------------------------------------------------------------------------------------------------------------------------------------------------------------------------------------------------------------------|
| 5.4. Where is/are the litter box/es positioned?                                                  | of weekly or monthly complete cleaning                                                                                                                                                                                                                                                             |
| 5.5. Has a modification of toilet management been performed because of urination problems?       | 5.4. Please specify room, position in the room, accessibility of the litter box/es<br>5.5. No; yes; if yes, please specify which modification                                                                                                                                                      |
| <b>6. Disease process</b>                                                                        |                                                                                                                                                                                                                                                                                                    |
| 6.1. How many times did your cat have to be treated by a veterinarian due to urination problems? | 6.1. Once; twice; third time; etc                                                                                                                                                                                                                                                                  |
| 6.2. How many times did your cat have to be treated as an inpatient due to urination problems?   | 6.2. Once; twice; third time; etc                                                                                                                                                                                                                                                                  |
| 6.3. When was your cat treated respectively due to urination problems?                           | 6.3. Please specify month and year of presentation to the veterinarian                                                                                                                                                                                                                             |
| 6.4. Which kind of urination problems did your cat show?                                         | 6.4. Pain during the act of urination; bloody urine; increasing urination of little amounts; pressing during the act of urination; urination outside the litter box; lack of urination<br>Yes; no; if no, please specify which clinical signs during which episode                                 |
| Did your cat show each time the same urination problems?                                         |                                                                                                                                                                                                                                                                                                    |
| 6.5. Which diagnosis did the veterinarian make?                                                  | 6.5. Idiopathic inflammation of the bladder; uroliths; bacterial urinary tract infection; inflammatory plug in the urethra; severe crystalluria; bladder tumour; no specific diagnosis<br>Yes; no; if no, please specify which other diagnoses                                                     |
| Was the diagnosis each time the same?                                                            |                                                                                                                                                                                                                                                                                                    |
| 6.6. Which treatment did your cat get?                                                           | 6.6. Fluid therapy; pain reliever; drugs for relaxing the urethra; antibiotics; glycosaminoglycans; replacement of urinary catheter; amputation of the penis; other treatment; if other treatment, please specify which one<br>Yes; no; if no, please specify which treatment during which episode |
| Was the treatment each time the same?                                                            |                                                                                                                                                                                                                                                                                                    |
| <b>7. Other clinical signs</b>                                                                   |                                                                                                                                                                                                                                                                                                    |
| 7.1. Have you noticed other health-related problems of your cat?                                 | 7.1. No other clinical signs; sickness; diarrhoea; increasing grooming; conspicuous behaviour; skin irritation; other clinical signs; if other clinical signs, please specify which ones                                                                                                           |
| 7.2. Did these problems recede without                                                           | 7.2. Yes; no                                                                                                                                                                                                                                                                                       |

| Question                                                                                                             | Response options                                                                                                                                |
|----------------------------------------------------------------------------------------------------------------------|-------------------------------------------------------------------------------------------------------------------------------------------------|
| any treatment?                                                                                                       |                                                                                                                                                 |
| <b>8. Other diseases</b><br>Has your cat been diagnosed with other diseases?                                         | No other known diseases; thyroid hyperfunction; diabetes mellitus; kidney disease; other diseases; if other diseases, please specify which ones |
| <b>9. Death</b><br>9.1. Did your cat die or had to be euthanased?                                                    | 9.1. No; death or euthanasia due to FLUTD; death or euthanasia due to another reason; if due to another reason, please specify which reason     |
| 9.2. When did your cat die?                                                                                          | 9.2. Please specify month and year of death                                                                                                     |
| <b>10. Permission to contact the private veterinarian</b><br>Do you agree with contacting your private veterinarian? | Yes; no; if yes, please specify contact information of the veterinarian                                                                         |

DSH = domestic shorthair
